# Supplementary material for: Feasibility of a Wiki as a Participatory Tool for Patients in Clinical Guideline Development
Source: PubMed Central journal article supplement (PMC3510744; doi:10.2196/jmir.2080), 2012-10-26
Supplement: jmir_v14i5e138_app1.pdf [file jmir_v14i5e138_app1.pdf]

**Statements (n=22) rated on a 5-point Likert scale (1= strongly agree, 5= strongly disagree)**

**Ease of Use of the website**

- I am able to find the website easily
- The website has a good availability
- The website has a clear place for login
- The goal of the website is clear to me
- The instructions for use of the website are clear to me
- The instructions for modifying previously formulated recommendations and adding new recommendations are clear to me
- The use of the website is efficient  
(speed at which the website enables a user to accurately and successfully add and modify recommendations)
- Navigating through the website is easy
- The links on the website are functional
- It is clear to me where to ask questions and/or report problems with the website

**Layout of the website**

- The used layout makes the website accessible
- The used layout encourages the use of the website
- The layout of the website is conveniently arranged

**Content of the website**

- The content on the website is well organized
- The clarifying text on the website is easily understandable
- I am satisfied with the content of the recommendations formulated on the website
- The clustering of recommendations into different sections on the website is useful to search recommendations (general care, gynecologic care etc.)
- The recommendations formulated on the website are in agreement with my actual opinion on fertility care in the Netherlands

**Value of the used wiki**

- The used wiki is a suitable way of gaining recommendations for a national guideline
- The used wiki is easy in use
- The used wiki is easy accessible

**Privacy on the website**

- I am not afraid for abuse of my personal data on the website

**Additional open questions**

- Can you provide the three advantages of the website?
- Can you provide the three disadvantages of the website?
- Can you provide potentials for improvement of the wiki-website?
- Would you recommend wikifreya to others?
- Would you re-participate in a similar project in the future?
- Do you have any additions to his questionnaire?

= statement

= open question
