# Supplementary material for: Feasibility of a Wiki as a Participatory Tool for Patients in Clinical Guideline Development
Source: PubMed Central journal article supplement (PMC3510744; doi:10.2196/jmir.2080), 2012-10-26
Supplement: jmir_v14i5e138_app2.pdf [file jmir_v14i5e138_app2.pdf]

a= Navigation: homepage, recommendations, project description, recent modifications, random page, help and contact, frequently asked questions.

b= Search

c= Help

d= Section General care

e= Subsections regarding information, organization, staffs' competence and communication.

f= Recommendations on section general care and the subsection information provision.

Translation:

GENERAL CARE

[What should I do?](#)

Below you find the recommendations for fertility care in general. We kindly invite you to modify these or add new recommendations. Click [here](#) to edit.

**Information provision**

\* My doctor needs to point out the internet sites providing information and contact with co-patients.

\* etc.
