# Supplementary material for: Feasibility of a Wiki as a Participatory Tool for Patients in Clinical Guideline Development
Source: PubMed Central journal article supplement (PMC3510744; doi:10.2196/jmir.2080), 2012-10-26
Supplement: jmir_v14i5e138_app3.pdf [file jmir_v14i5e138_app3.pdf]

a= Navigation: homepage, recommendations, project description, recent modifications, random page, help and contact, frequently asked questions.

b= search

c= help

d= listed sections

e= button to register

f= image of the marketing poster used in waiting rooms of all Dutch gynecologists and Urologists

Translation:

FreyaWiki: Recommendations

I am new here

If you are planning to edit the recommendations, please register and fill in your background characteristics. Click on the following link.

Share your ideas

**Click below on the section, of which you would like to share your ideas.** For example, you have a recommendation for the General Practitioner, then click on **General practitioner** and look if your recommendation has been previously formulated by someone else. If not, you may add your recommendation. If you have a recommendation for the entire fertility care, then you can leave it in the **General Care** section. If you have a recommendation, of which you don't know to which section this applies, you may add this to the section **Remaining**.

#### Sections

\* General care

\* General Practitioner

\* Gynecologist

\* Urologist
